# THE AMERICAN JOURNAL OF PSYCHIATRY

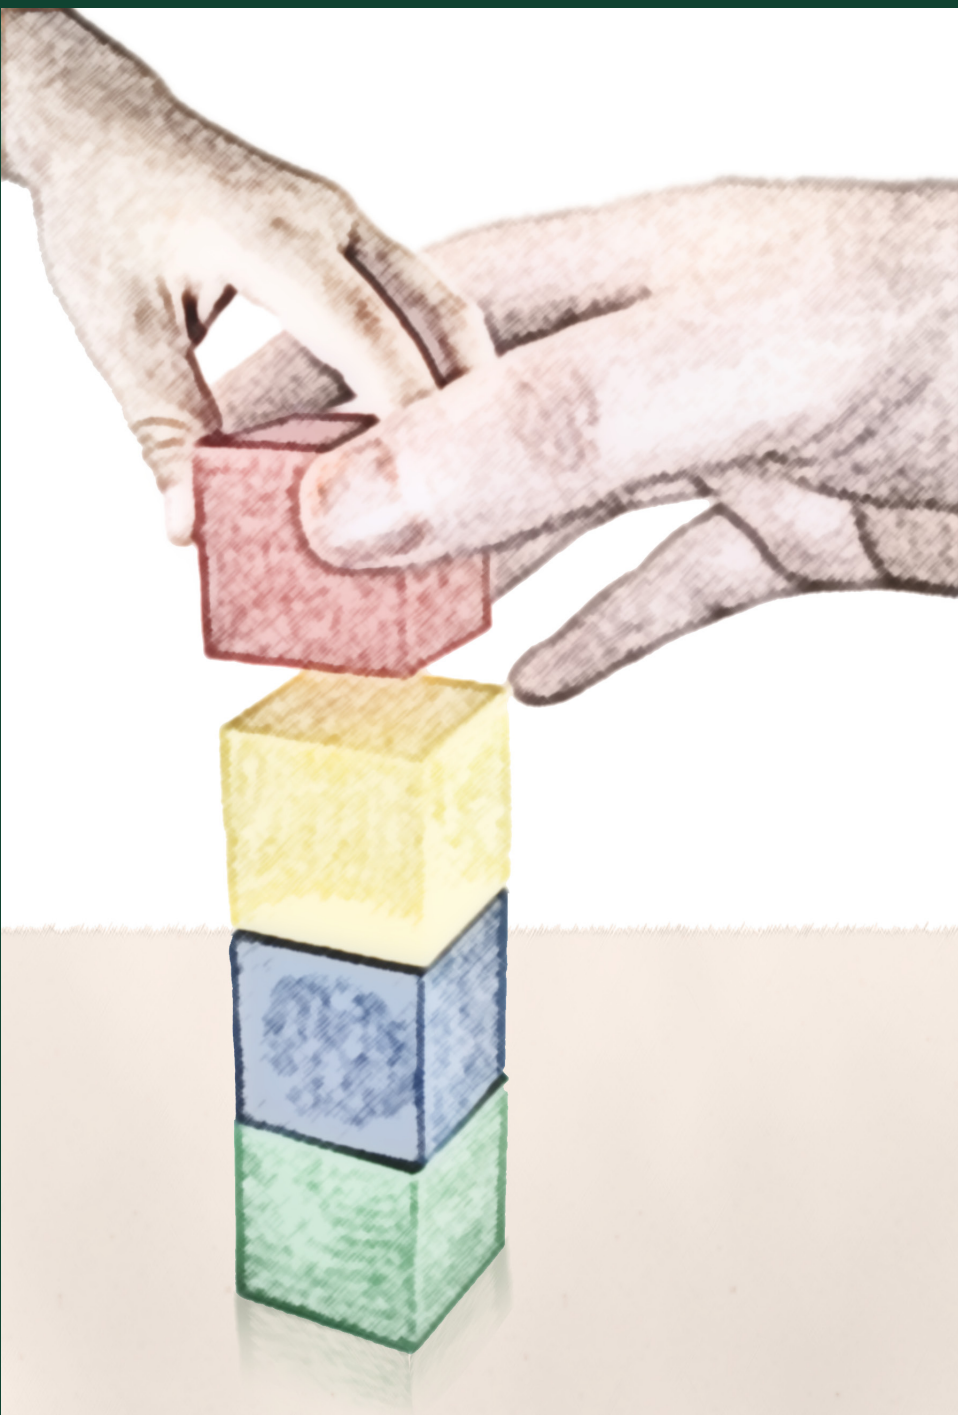

◀ **Prevalence of Autism Spectrum Disorders in a Total Population Sample**

Young Shin Kim, M.D., Ph.D., et al. 904

**Depressive Symptoms, Health Behaviors, and Subsequent Inflammation in Patients With Coronary Heart Disease: Prospective Findings From the Heart and Soul Study**

Hester E. Duivis, M.Sc., et al. 913

**Analysis of 94 Candidate Genes and 12 Endophenotypes for Schizophrenia From the Consortium on the Genetics of Schizophrenia**

Tiffany A. Greenwood, Ph.D., et al. 930

**Comparison of Antipsychotics for Metabolic Problems**

T. Scott Stroup, M.D., M.P.H., et al. 947

**Continuing Medical Education** 1005

**September 2011**  
**Volume 168 • Number 9**

Official Journal of the  
AMERICAN PSYCHIATRIC ASSOCIATION

[ajp.psychiatryonline.org](http://ajp.psychiatryonline.org)
