# The American Journal of PSYCHIATRY

Latest  
IMPACT  
FACTOR  
12.759!

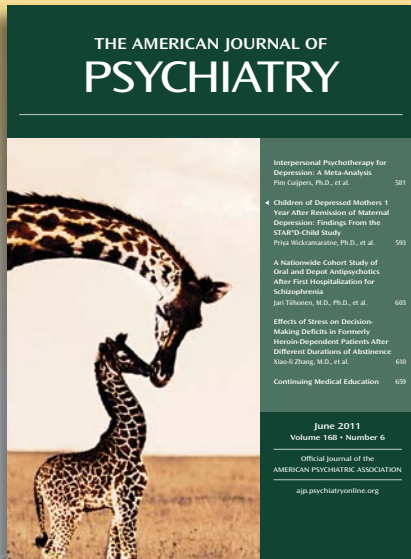

## Official Journal of the American Psychiatric Association

Edited by Robert Freedman, M.D.

- The *American Journal of Psychiatry* has an impact factor of 12.759, a rise from last year's 12.522 and 2-point rise from the previous year's 10.545, according to the recently released 2010 Journal Citation Reports® (Thomson Reuters, 2011), placing it 2nd among the 126 journals in psychiatry journals indexed, while still remaining the far-and-away leader in total citations.

- The *American Journal of Psychiatry* (AJP) is also the #2 journal in psychiatry in terms of immediacy according to Thomson Scientific's Immediacy Index. This important performance metric

is calculated by dividing the number of citations to articles published in a given year by the number of articles published in that year.

- The Immediacy Index is a good measure of how quickly a given journal's articles are cited—AJP's #2 placement is a result of publishing articles that are relevant, covering current “hot” topics and cutting-edge research, and getting these findings to the field faster with AJP in Advance, the Journal's online-ahead-of-print publication protocol.

- A recent poll conducted by the BioMedical & Life Sciences Division of The Special Libraries Association identified the 100 most influential journals in all of Biology & Medicine over the last 100 years. *The American Journal of Psychiatry* was among those honored, the only psychiatry/psychology journal represented.

No other psychiatric journal reaches more psychiatrists with greater impact or immediacy than the journal that the overwhelming majority of psychiatrists considers essential: AJP.

ISSN 0002-953X      [ajp.psychiatryonline.org](http://ajp.psychiatryonline.org)

To order a subscription, visit [www.appi.org](http://www.appi.org).

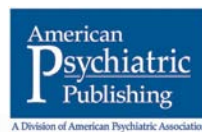

The *First* and *Last* Word in Psychiatry

[www.appi.org](http://www.appi.org) • 1-800-368-5777 • 703-907-7322

Find us on [facebook](https://www.facebook.com/ajp) and [twitter](https://twitter.com/ajp) Priority Code AH1132

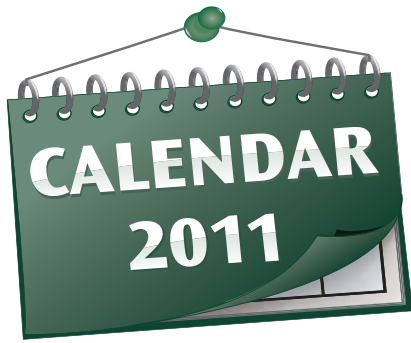

For free listing of your organization's official annual or regional meeting, please send us the following information: sponsor, location, inclusive dates, type and number of continuing education credits (if available), and the name, address, and telephone number of the person or group to contact for more information. In order for an event to appear in our listing, all notices and changes must be received at least 6 months in advance of the meeting and should be addressed to:

**Calendar, American Journal of Psychiatry, 1000 Wilson Boulevard, Suite 1825, Arlington, VA 22209-3901, [swestate@psych.org](mailto:swestate@psych.org) (e-mail).**

Because of space limitations, only listings of meetings of the greatest interest to journal readers will be included.

---

## SEPTEMBER

**September 15**, Deadline for abstract submissions for May 2012 Annual Meeting of the American Psychiatric Association.

---

## OCTOBER

**October 5–8**, II International Congress, Dual Disorders, Addictive Behaviors and other Mental Disorders, Barcelona, Spain. Contact: SEPD, [www.cipd2011.com](http://www.cipd2011.com) (web site).

**October 18–23**, 58th Annual Meeting, American Academy of Child and Adolescent Psychiatry, Toronto, Ontario. Contact: AACAP, 3615 Wisconsin Avenue, N.W., Washington, DC 20016-3007; (202) 966-7300 (tel), (202) 966-2891 (fax), [meetings@aacap.org](mailto:meetings@aacap.org) (e-mail), [www.aacap.org](http://www.aacap.org) (web site).

**October 27–30**, 63rd Institute on Psychiatric Services, American Psychiatric Association, San Francisco, CA. Contact: APA Annual Meetings Dept., 1000 Wilson Blvd., Ste. 1825, Arlington, VA 22209; (703) 907-7815.

---

## NOVEMBER

**November 1–December 5**, Poster submissions open for May 2012 Annual Meeting of the American Psychiatric Association.

---

## DECEMBER

**December 4–8**, 50th Annual Meeting, American College of Neuropsychopharmacology, Waikaloa Beach, Hawaii. Contact: [acnp@acnp.org](mailto:acnp@acnp.org); (615) 324-2360.

---

## MARCH 2012

**March 21–24**, 23rd Annual Meeting, American Neuropsychiatric Association, New Orleans, La. Contact: (614) 447-2077 or visit [www.anpaonline.org](http://www.anpaonline.org) (web site).

---

## APRIL 2012

**April 22–25**, Annual Meeting of the North American Society for Psychosocial Obstetrics and Gynecology (NASPOG), Providence, R.I. Contact: NASPOG National Office, 8213 Lakenheath Way, Potomac, MD 20854; (301) 983-6282 (tel); [info@naspog.org](mailto:info@naspog.org) (email); [www.naspog.org](http://www.naspog.org) (web site).

---

## MAY 2012

**May 3–5**, 56th Annual Meeting, American Academy of Psychoanalysis and Dynamic Psychiatry, Philadelphia, Pa. Contact: Executive Office, AAPDP, PO Box 30, Bloomfield, CT 06002; (888) 691-8281 (tel), (860) 286-0787 (fax), [info@aapdp.org](mailto:info@aapdp.org) (e-mail), [www.aapdp.org](http://www.aapdp.org) (web site).

**May 5–9**, 165th Annual Meeting, American Psychiatric Association, Philadelphia, Pa. Contact: APA Annual Meetings Dept., 1000 Wilson Blvd., Ste. 1825, Arlington, VA 22209; (703) 907-7815.

---

## JUNE 2012

**June 23–27**, Joint Organizational Meeting of the Organization of Teratology Information Specialists, the Teratology Society, and the Neurobehavioral Teratology Society, Baltimore, Md. Contact: Ms. Dee Quinn, University of Arizona, Drachman Hall, PO Box 210202, 1295 N. Martin, Room B308, Tucson, AZ 85721-0202; (520) 626-3547 (tel); [www.otispregnancy.org](http://www.otispregnancy.org); [www.teratology.org](http://www.teratology.org); [www.nbts.org](http://www.nbts.org).

---

## OCTOBER 2012

**October 3–5**, International Biennial Congress of the Marcé Society (International Society for the Understanding, Prevention and Treatment of Mental Illness Related to Childbearing), in collaboration with the Société Marcé Francophone, Paris, France (conducted in English). Contact: Ms. Nicole Greer, 5034-A Thoroughbred Lane, Brentwood, TN 37027 USA; (615) 324-2362 (tel); [info@marcesociety.com](mailto:info@marcesociety.com) (email); [www.marcesociety.com](http://www.marcesociety.com) (web site).

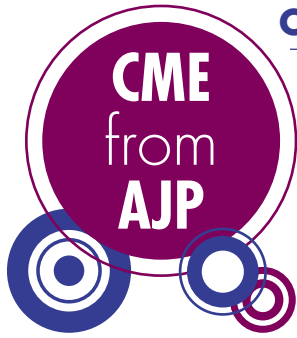

## Continuing Medical Education

Three articles in this issue form the basis of a short course with questions that can be answered for up to 1 *AMA PRA Category 1 Credit™* each by visiting <http://cme.psychiatryonline.org/> and clicking on “American Journal of Psychiatry CME.”

CME credit is issued only online, and a paid subscription to the AJP CME course program is required.

This month's courses appear on pages 1005–1008.

**FREE AUDIO!**

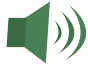

## Have You Heard?

You can listen to highlights of *The American Journal of Psychiatry* by downloading a monthly free .mp3 audio file from our web site (<http://ajp.psychiatryonline.org/misc/audio.dtl>) or by subscribing to the AJP Audio podcast at iTunes or other feed reader (e.g., NewzCrawler, FeedDemon, Bloglines, Google Reader). Presented by Deputy Editor Dr. Susan Schultz or by Editorial Director Michael Roy, each month's audio lasts approximately 30 minutes and covers several research articles, the Treatment in Psychiatry feature, and one or two editorials.

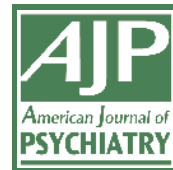

Coming in the October 2011 issue\*

## THE AMERICAN JOURNAL OF PSYCHIATRY

### Treatment of Suicide Attempters With Bipolar Disorder: A Randomized Clinical Trial Comparing Lithium and Valproate in the Prevention of Suicidal Behavior

M.A. Oquendo, H.C. Galfalvy, D. Currier, M.F. Grunebaum, L. Sher, G.M. Sullivan, A.K. Burke, J. Harkavy-Friedman, M.E. Sublette, R.V. Parsey, and J.J. Mann

### National Trends in the Antipsychotic Treatment of Psychiatric Outpatients With Anxiety Disorders

J.S. Comer, R. Mojtabai, and M. Olfson

### Cognitive-Behavioral Therapy for Depression in Parkinson's Disease: A Randomized, Controlled Trial

R.D. Dobkin, M. Menza, L.A. Allen, M.A. Gara, M.H. Mark, J. Tiu, K.L. Bienfait, and J. Friedman

### Association of the Alzheimer's Gene *SORL1* With Hippocampal Volume in Young, Healthy Adults

J. Bralten, A. Arias-Vásquez, R. Makkinje, J.A. Veltman, H.G. Brunner, G. Fernández, M. Rijpkema, and B. Franke

\*Can't wait? Visit [ajp.psychiatryonline.org](http://ajp.psychiatryonline.org) and click the “AJP in Advance” logo to see all articles uploaded in advance of print!

# The Residents' JOURNAL

*The Residents' JOURNAL*  
a publication of  
The American Journal of Psychiatry

August 2011      Volume 6      Issue 8

**Inside**

- 1 In This Issue
- 2 **Training the Next Generation**  
Sarah M. Fayad, M.D.
- 3 **Considerations in the Treatment of Pediatric Bipolar Disorder**  
Matthew E. Hirschtritt, B.A., Allison Tweedie, M.D.
- 6 **Borderline Personality Disorder and Associated Axis I Comorbidities**  
Michele Retouvey, B.Sc.
- 8 **Ethics and Medical Abandonment in a Rehabilitation Facility: A Clinical Case Conference**  
Kedar Kirtane, \_\_\_\_\_, Jennifer Sbicca, \_\_\_\_\_
- 10 **Co-Occurring Eating, Borderline Personality, and Substance Use Disorders**  
Mario Levine, M.D.
- 12 **How Well Are Residents Informed About Boundary Crossings and Violations?**  
Archana Devi Brojmohun, M.D.
- 14 **Book Review**  
Michael Ascher, M.D., Shruiti Mutalik, M.D.
- 15 **Test Your Knowledge**
- 16 **Residents' Journal Info**

*In This Issue*



The education of medical students is one of the many duties assigned to residents as part of their professional training. Thus, *The Residents' Journal* is committed to providing opportunities for medical students to develop skills that will benefit them in their own future training. This issue features three articles authored by medical students. Matthew E. Hirschtritt, a second-year student, is the lead author of an article on the treatment of pediatric bipolar disorder. Michele Retouvey, a fourth-year student, discusses axis I comorbidities of borderline personality disorder. Finally, Kedar Kirtane and Jennifer Sbicca, both fourth-year students, present a case report on the ethics surrounding medical abandonment in a rehabilitation setting.

Editor-in-Chief  
Sarah M. Fayad, M.D.

Senior Editor  
Joseph M. Carimelo, M.D.

Associate Editor  
Manila Seawell, M.D.

Editors Emeriti  
Sarah B. Johnson, M.D.  
Molly McVoy, M.D.

Staff Editor  
Angela Moore

The Residents' Journal accepts manuscripts authored by medical students, resident physicians, and fellows. To submit your paper, please visit the manuscript submission site at [mc.manuscriptcentral.com/appi-ajp](http://mc.manuscriptcentral.com/appi-ajp) and either create an account or use your existing account. For manuscript type, select "Residents." Then follow the instructions to upload your manuscript. Residents who are interested in participating as Guest Section Editors should e-mail the Residents' Journal Editor-in-Chief Sarah M. Fayad at [fayad@ufl.edu](mailto:fayad@ufl.edu).

See the September 2010 issue for details on the new peer review process.

The Residents' Journal is sent free-of-charge to all psychiatry residents. Anyone interested in being included on the distribution list should contact Angela Moore, the Residents' Journal staff editor at [ajp@psych.org](mailto:ajp@psych.org) with "Subscribe to Residents' Journal" in the subject line.

**Upcoming Issue Themes**  
September: Addiction

To access the complete Residents' Journal archives, visit [ajp.psychiatryonline.org/misc/Residents\\_Journal.dtl](http://ajp.psychiatryonline.org/misc/Residents_Journal.dtl)



# get CME from AJP

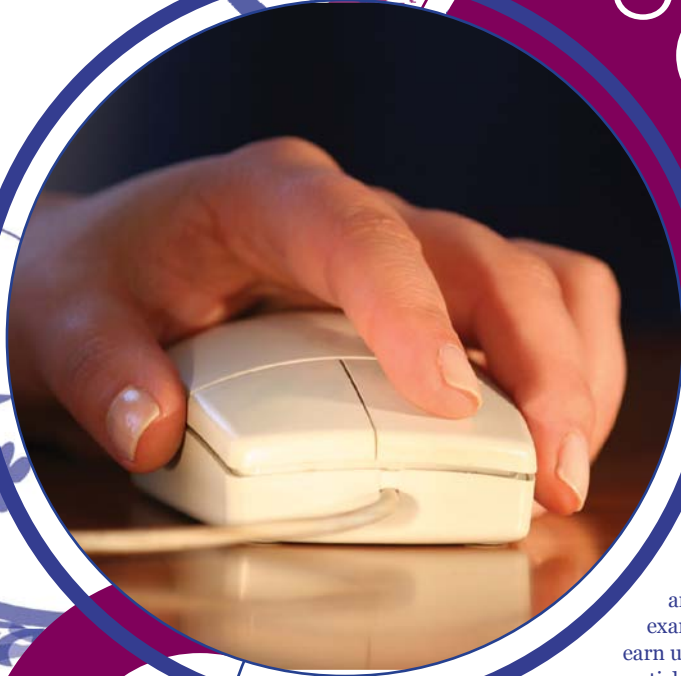

Brief companion exams are created for three of the most influential articles from each issue. By reading the articles and completing the online exams, you can test your knowledge and earn up to 1 *AMA PRA Category 1 Credit*<sup>™</sup> per article. Correct answers are highlighted for your reference upon completion of the course. A link from the question to the correct answer in context will also be highlighted in the associated article, thus extending the learning experience.

CME credit is only provided online, and a subscription to the AJP CME program is required. From the moment you subscribe to the AJP CME program, you will be able to select from 72 courses from among 40 possible subject areas. You'll also be able to access the next 33 courses as they become available. For more information and pricing, please go to <http://cme.psychiatryonline.org/misc/aboutajpcme.shtml>

This activity is sponsored by the American Psychiatric Association. The American Psychiatric Association is accredited by the Accreditation Council for Continuing Medical Education to provide continuing medical education for physicians. The American Psychiatric Association designates each educational activity for a maximum of 1 *AMA PRA Category 1 Credit*<sup>™</sup>. Physicians should only claim credit commensurate with the extent of their participation in the activity.

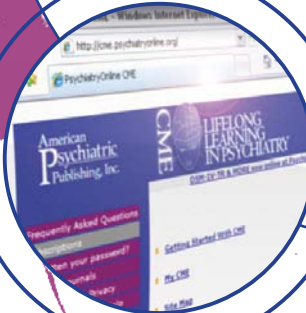

Fulfill your CME requirement while staying current on the latest advances in psychiatry.  
Subscribe to AJP CME!

## Contents

- A9 Editorial Board  
A11 Highlights of this issue

## Editorials

- 173 **Differential outcome of schizophrenia: where we are and where we would like to be**  
O. Gureje and A. Cohen

- 175 **Nightwatch, 1842 – poems by doctors**  
Tom Pow

- 176 **Alcohol-related brain damage: a 21st-century management conundrum**  
K. Wilson

- 178 **Combining routine outcomes measurement and 'Payment by Results': will it work and is it worth it?**  
A. J. D. Macdonald and M. Elphick

## Review articles

- 180 **Abortion and mental health: quantitative synthesis and analysis of research published 1995–2009**  
P. K. Coleman

- 187 **Advanced dental disease in people with severe mental illness: systematic review and meta-analysis**  
S. Kisely, L.-H. Quek, J. Pais, R. Laloo, N. W. Johnson and D. Lawrence

- 193 **4:48 Psychosis – extra**  
Sarah Kane

## Papers

- 194 **Cross-national clinical and functional remission rates: Worldwide Schizophrenia Outpatient Health Outcomes (W-SOHO) study**  
J. M. Haro, D. Novick, J. Bertsch, J. Karagianis, M. Dossenbach and P. B. Jones

- 202 **Neural correlates of cognitive impairment in schizophrenia**  
J. Ortiz-Gil, E. Pomarol-Clotet, R. Salvador, E. J. Canales-Rodríguez, S. Sarró, J. J. Gomar, A. Guerrero, B. Sans-Sansa, A. Capdevila, C. Junqué and P. J. McKenna

- 211 **Changes in neuropsychological functioning following treatment for late-life generalised anxiety disorder**  
M. A. Butters, R. K. Bhalla, C. Andreescu, J. Loebach Wetherell, R. Mantella, A. E. Begley and E. J. Lenze

- 218 **Thomas Drapes, Medical Superintendent of the Enniscorthy – 100 years ago**  
Dermod Walsh

- 219 **Affective disorders, anxiety disorders and the risk of alcohol dependence and misuse**  
W. Liang and T. Chikritzhs

- 224 **Shame – in 100 words**  
Gillian Rathbone

- 225 **Cognitive interpersonal maintenance model of eating disorders: intervention for carers**  
E. Goddard, P. Macdonald, A. R. Sepulveda, U. Naumann, S. Landau, U. Schmidt and J. Treasure

- 232 **Deprivation of Liberty Safeguards in England: implementation costs**  
A. Shah, M. Pennington, C. Heginbotham and C. Donaldson

- 239 **Impact of coercive measures on life stories: qualitative study**  
I. Sibitz, A. Scheutz, R. Lakeman, B. Schrank, M. Schaffer and M. Amering

## Short reports

- 245 **Schizophrenia with the 22q11.2 deletion and additional genetic defects: case history**  
M. Toyosima, M. Maekawa, T. Toyota, Y. Iwayama, M. Arai, T. Ichikawa, M. Miyashita, T. Arinami, M. Itokawa and T. Yoshikawa

- 247 **Mitral valve prolapse and anxiety disorders**  
A. S. Filho, B. C. Maciel, M. M. D. Romano, T. F. Lascaia, C. Trzesniak, M. C. Freitas-Ferrari, A. E. Nardi, R. Martín-Santos, A. W. Zuardi and J. A. S. Crippa

## Columns

- 249 **Correspondence**  
255 **Book reviews**  
260 **Contents of *Advances in Psychiatric Treatment***  
261 **Contents of the *American Journal of Psychiatry***  
262 **From the Editor's desk**

## Cover picture

*Everything is Real Except God and Death* (2010) (180 × 120 cm, oil on canvas). George Harding (b. 1983)

The artist writes: 'I used to get art lessons when I was a small boy from a next-door neighbour who inspired me, and art has been my passion ever since.'

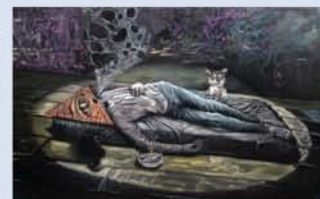

'I did my foundation at Camberwell and graduated from Chelsea College of Art and Design in fine art in 2007. I now have a studio in Southwark, London, where I work and live.'

'Art to me is emotive and is a way of coping with life and my mental illness. It is also something that guides me, something that I can rely upon and excel in.'

'The painting is explained by its title. The image speaks of the delusions, paranoia and imaginary beliefs that envelop a person when smoking cannabis. The image came together by making a collage of specific symbols and signs, which was then altered through painting. The figure featured in the work is after Henry Wallis's painting in 1856 called *The Death of Chatterton*, a poet.'

'If you would like to know more about my work, please contact me through my website ([www.georgejharding.co.uk](http://www.georgejharding.co.uk)).'

With thanks to the artist, and to Beth Elliott, the Bethlem Gallery, London ([www.bethlemgallery.com](http://www.bethlemgallery.com)).

We are always looking for interesting and visually appealing images for the cover of the *Journal* and would welcome suggestions or pictures, which should be sent to Dr Allan Beveridge, British Journal of Psychiatry, 17 Belgrave Square, London SW1X 8PG, UK or [bjp@rcpsych.ac.uk](mailto:bjp@rcpsych.ac.uk).
